# Supplementary material
Source: PubMed Central journal article supplement (PMC5033949)
Supplement: jciinsight-1-86574-s001.pdf [file jciinsight-1-86574-s001.pdf]

## Clinical Characterization of Patients with Cardiovascular Disease

|                          | Non-diabetes<br>(n=5) | Diabetes<br>(n=5) | p-value |
|--------------------------|-----------------------|-------------------|---------|
| Age (yr)                 | 61.7 ± 7.4            | 61.6 ± 8.9        | 0.987   |
| Gender                   | Males                 | Males             | -       |
| BMI (kg/m <sup>2</sup> ) | 26.2 ± 1.9            | 35.9 ± 6.9        | 0.016   |
| HbA1c (%)                | 5.6 ± 2.0             | 7.0 ± 1.1         | 0.027   |
| SBP (mmHg)               | 147.0 ± 11.0          | 134.0 ± 12.0      | 0.149   |
| DBP (mmHg)               | 81.0 ± 8.0            | 72.0 ± 8.0        | 0.095   |
| Cholesterol (mM)         | 4.1 ± 0.9             | 4.3 ± 1.0         | 0.818   |
| LDL (mM)                 | 2.2 ± 0.7             | 2.0 ± 0.6         | 0.531   |
| HDL (mM)                 | 1.2 ± 0.4             | 1.0 ± 0.3         | 0.382   |

Supplemental Table 1

## Result of ANOVA Analysis

| Figure                                | Factor Variable           | P value for main effect    | Interaction                                                          | P value for interaction          |
|---------------------------------------|---------------------------|----------------------------|----------------------------------------------------------------------|----------------------------------|
| <b>Figure 1F</b>                      | Gene<br>Insulin           | <0.001<br><0.001           | Gene#Insulin                                                         | 0.01                             |
| <b>Figure 1H</b>                      | Gene<br>Insulin           | <0.001<br><0.001           | Gene#Insulin                                                         | 0.07                             |
| <b>Figure 2A</b>                      | Gene<br>Time<br>Diet      | 0.39<br><0.001<br><0.001   | Gene#Time<br>Gene#Diet<br>Time#Diet<br>Gene#Time#Diet                | 0.83<br>0.58<br><0.001<br>0.97   |
| <b>Figure 2B</b>                      | Gene<br>Time<br>Diet      | 0.76<br><0.001<br>0.01     | Gene#Time<br>Gene#Diet<br>Time#Diet<br>Gene#Time#Diet                | 0.96<br>0.78<br><0.12<br>0.97    |
| <b>Figure 2E</b>                      | Gene<br>Diet              | <0.001<br><0.001           | Gene#Diet                                                            | 0.001                            |
| <b>Figure 2I<br/>p-AKT</b>            | Gene<br>Insulin<br>Diet   | <0.001<br><0.001<br><0.001 | Gene#Insulin<br>Gene#Diet<br>Insulin#Diet<br>Gene#Insulin#Diet       | <0.01<br>0.14<br><0.001<br>0.25  |
| <b>Figure 2I<br/>p-eNOS</b>           | Gene<br>Insulin<br>Diet   | <0.001<br><0.001<br><0.001 | Gene#Insulin<br>Gene#Diet<br>Insulin#Diet<br>Gene#Insulin#Diet       | <0.001<br>0.1<br><0.001<br>0.17  |
| <b>Figure 3B<br/>VCAM1</b>            | Gene<br>Insulin<br>Ox-LDL | 0.001<br>0.005<br><0.001   | Gene#Insulin<br>Gene#Ox-LDL<br>Insulin#Ox-LDL<br>Gene#Insulin#Ox-LDL | 0.18<br>0.004<br>0.03<br>0.11    |
| <b>Figure 3B<br/>p-AKT</b>            | Gene<br>Insulin<br>Ox-LDL | <0.001<br><0.001<br><0.001 | Gene#Insulin<br>Gene#Ox-LDL<br>Insulin#Ox-LDL<br>Gene#Insulin#Ox-LDL | <0.001<br>0.19<br><0.001<br>0.05 |
| <b>Figure 3C</b>                      | Gene<br>Insulin<br>Ox-LDL | <0.001<br>0.04<br><0.001   | Gene#Insulin<br>Gene#Ox-LDL<br>Insulin#Ox-LDL<br>Gene#Insulin#Ox-LDL | 0.49<br><0.001<br>0.17<br>0.9    |
| <b>Figure 3D<br/>Insulin's effect</b> | Gene<br>Insulin<br>Ox-LDL | 0.002<br>0.04<br><0.001    | Gene#Insulin<br>Gene#Ox-LDL<br>Insulin#Ox-LDL<br>Gene#Insulin#Ox-LDL | 0.29<br>0.002<br>0.02<br>0.26    |
| <b>Figure 3D<br/>Antibody effect</b>  | Gene<br>Antibody          | 0.004<br>0.01              | Gene#Antibody                                                        | <0.05                            |
| <b>Figure 3F<br/>p-AKT</b>            | Gene<br>Diet              | <0.001<br><0.001           | Gene#Diet                                                            | 0.89                             |
| <b>Figure 3F<br/>p-eNOS</b>           | Gene<br>Diet              | <0.001<br><0.001           | Gene#Diet                                                            | 0.002                            |

|                                          |                              |                            |                                                                               |                                      |
|------------------------------------------|------------------------------|----------------------------|-------------------------------------------------------------------------------|--------------------------------------|
| <b>Figure 4A</b>                         | Gene<br>Diet                 | 0.4<br><0.001              | Gene#Diet                                                                     | 0.6                                  |
| <b>Figure 4B<br/>Endothelium</b>         | Gene<br>Diet                 | 0.02<br><0.001             | Gene#Diet                                                                     | 0.01                                 |
| <b>Figure 4B<br/>Smooth Muscle Cells</b> | Gene<br>Diet                 | <0.001<br><0.001           | Gene#Diet                                                                     | 0.004                                |
| <b>Figure 4E</b>                         | Gene<br>Insulin              | <0.001<br><0.001           | Gene#Insulin                                                                  | <0.001                               |
| <b>Figure 4F</b>                         | Gene<br>Time                 | <0.001<br><0.001           | Gene#Time                                                                     | <0.001                               |
| <b>Figure 5B</b>                         | Insulin<br>Inhibitor         | <0.001<br><0.001           | Insulin#Inhibitor                                                             | 0.01                                 |
| <b>Figure 5C</b>                         | Gene<br>Insulin              | <0.001<br><0.001           | Gene#Insulin                                                                  | <0.001                               |
| <b>Figure 5F</b>                         | Gene<br>Insulin<br>Inhibitor | <0.001<br><0.001<br><0.001 | Gene#Insulin<br>Gene#Inhibitor<br>Insulin#Inhibitor<br>Gene#Insulin#Inhibitor | <0.001<br><0.001<br><0.001<br>0.02   |
| <b>Figure 6D</b>                         | Gene<br>Diet<br>Inhibitor    | <0.001<br><0.001<br><0.001 | Gene#Diet<br>Gene#Inhibitor<br>Diet#Inhibitor<br>Gene#Diet#Inhibitor          | <0.001<br><0.001<br><0.001<br><0.001 |
| <b>Figure 7A</b>                         | Gene<br>Insulin              | <0.001<br><0.001           | Gene#Insulin                                                                  | <0.001                               |
| <b>Figure 7C</b>                         | Gene<br>Diet                 | 0.01<br><0.001             | Gene#Diet                                                                     | 0.02                                 |
| <b>Figure 7D</b>                         | Gene                         | 0.04                       | NA                                                                            | NA                                   |
| <b>Figure 8B</b>                         | Gene                         | 0.003                      | NA                                                                            | NA                                   |
| <b>Figure 8D</b>                         | Gene                         | <0.05                      | NA                                                                            | NA                                   |
| <b>Figure 9C</b>                         | Gene<br>Diet                 | 0.002<br><0.001            | NA                                                                            | NA                                   |
| <b>Figure 9E<br/>Macrophages</b>         | Gene<br>Diet                 | 0.003<br><0.001            | NA                                                                            | NA                                   |
| <b>Figure 9E<br/>Collagen</b>            | Gene<br>Diet                 | 0.002<br><0.001            | NA                                                                            | NA                                   |
| <b>Figure 9F</b>                         | Gene<br>Diet                 | 0.99<br><0.001             | NA                                                                            | NA                                   |

Supplemental Table 2





**A**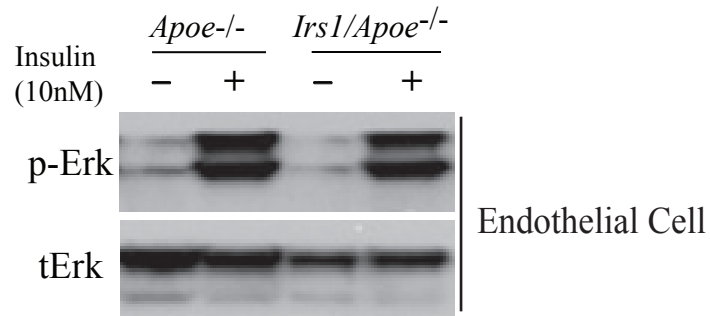**B**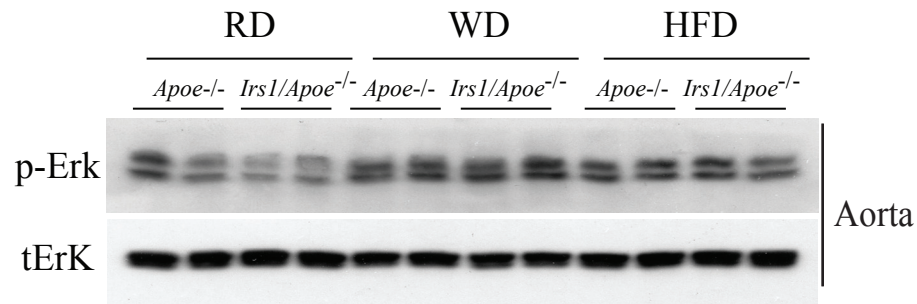

**Supplemental Figure 2. Activation of Erk in EC and aorta from *Apoe*<sup>-/-</sup> and *Irs1*/*Apoe*<sup>-/-</sup> mice.** (A) IB analysis of p-Erk/tErk protein levels in EC after insulin stimulation. (B) IB analysis of p-Erk/tErk levels in the aorta from *Apoe*<sup>-/-</sup> and *Irs1*/*Apoe*<sup>-/-</sup> mice fed on RD, WD and HFD. Data are represented as mean ± SEM of at least cellular replicates or three mouse replicates. (Two-way ANOVA for multiple comparisons involving two factorial variables and two-tailed Student's t-test for pairwise comparisons).

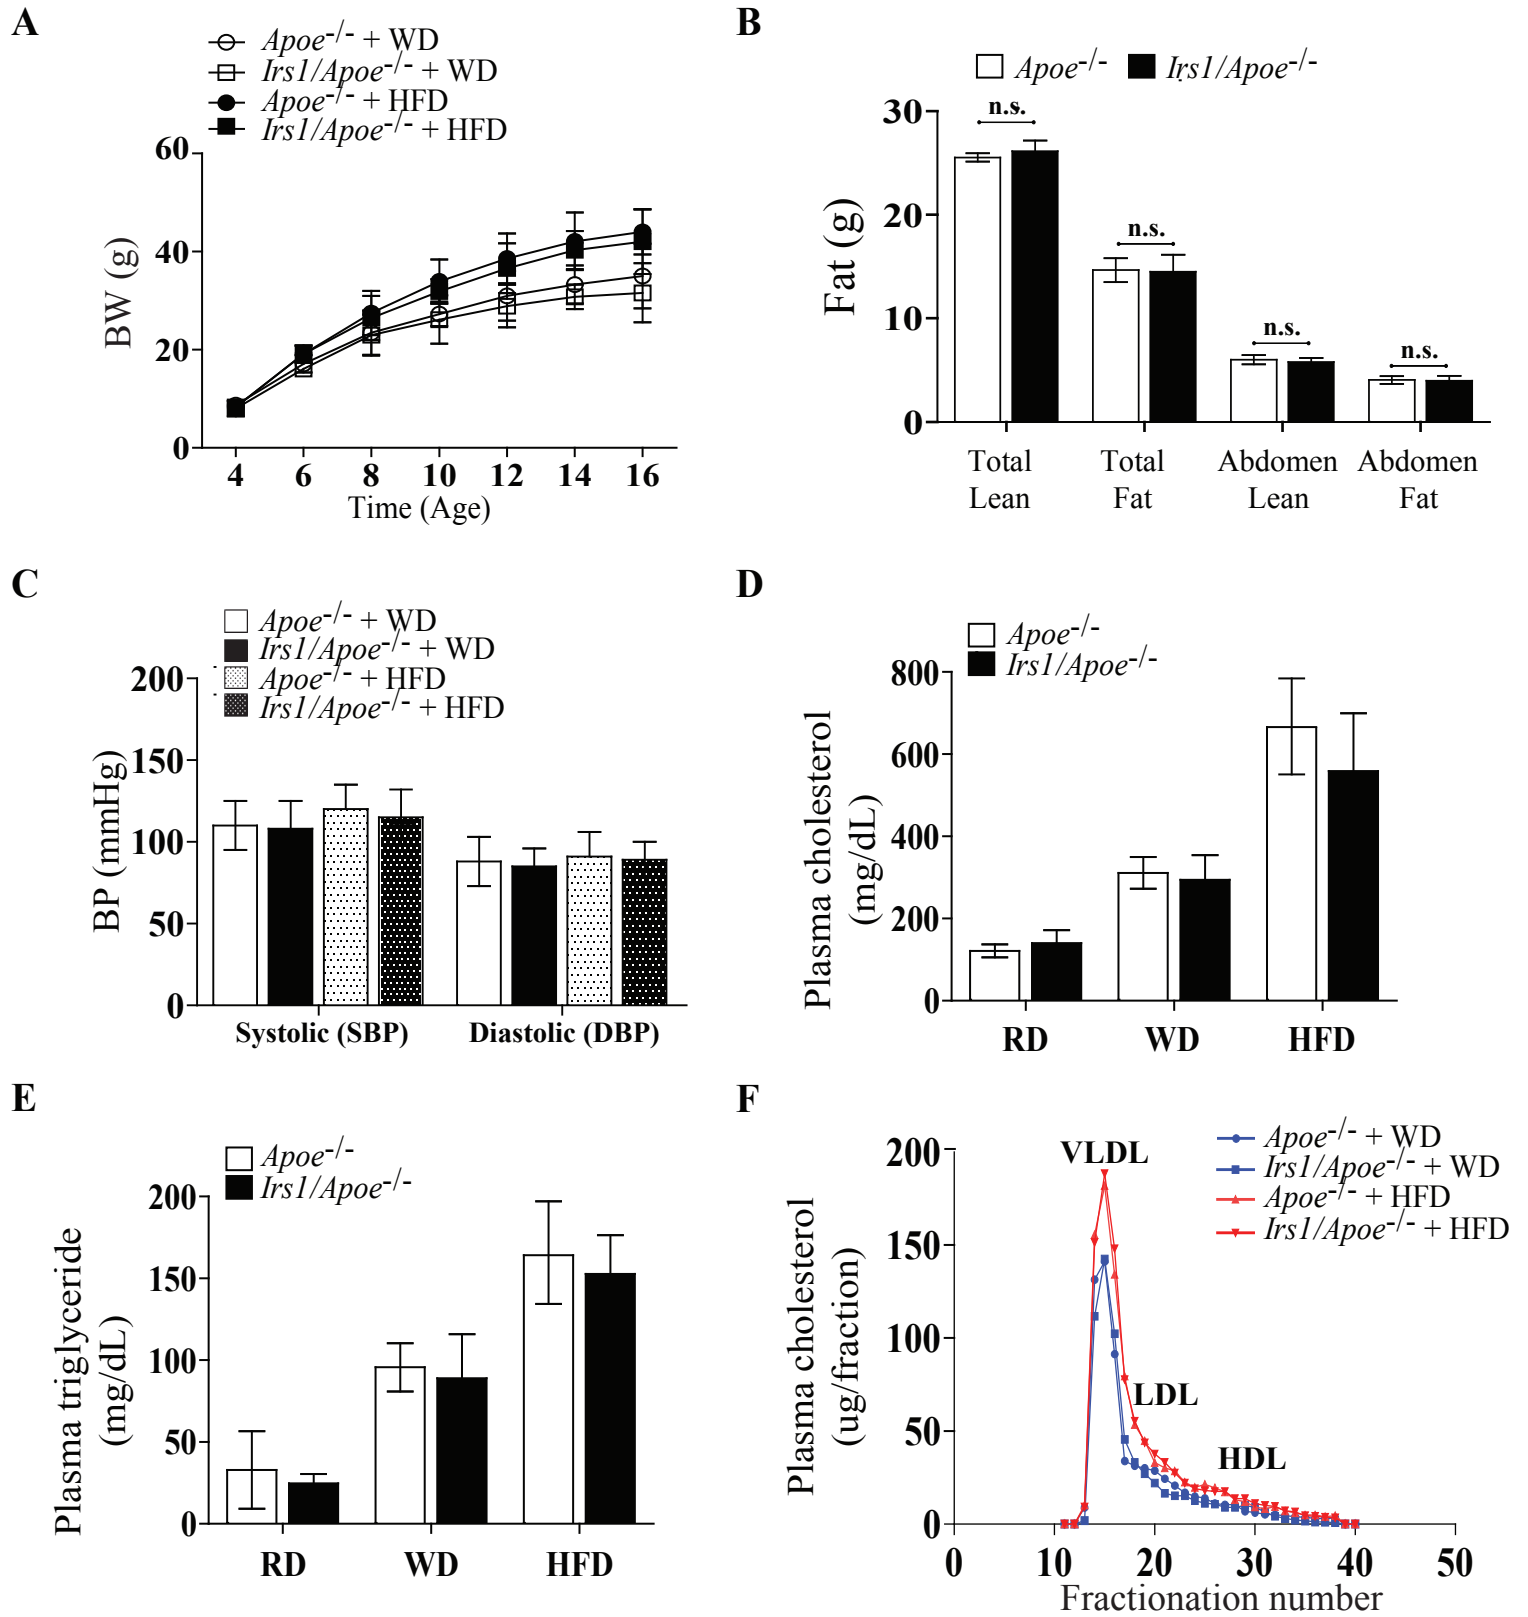

**Supplemental Figure 3. Metabolic parameters assay in *Apoe*<sup>-/-</sup> and *Irs1/Apoe*<sup>-/-</sup> mice.** (A) BW, (B) fat composition, (C) BP, (D and E) plasma cholesterol and triglyceride, and (F) plasma lipoprotein were measured in *Apoe*<sup>-/-</sup> and *Irs1/Apoe*<sup>-/-</sup> mice. All data are represented as mean ± SEM of at least five mouse replicates. (Mixed effects model for repeated measurement and two-way ANOVA for multiple comparisons involving two/three factorial variables and two-tailed Student's t-test for pairwise comparisons).

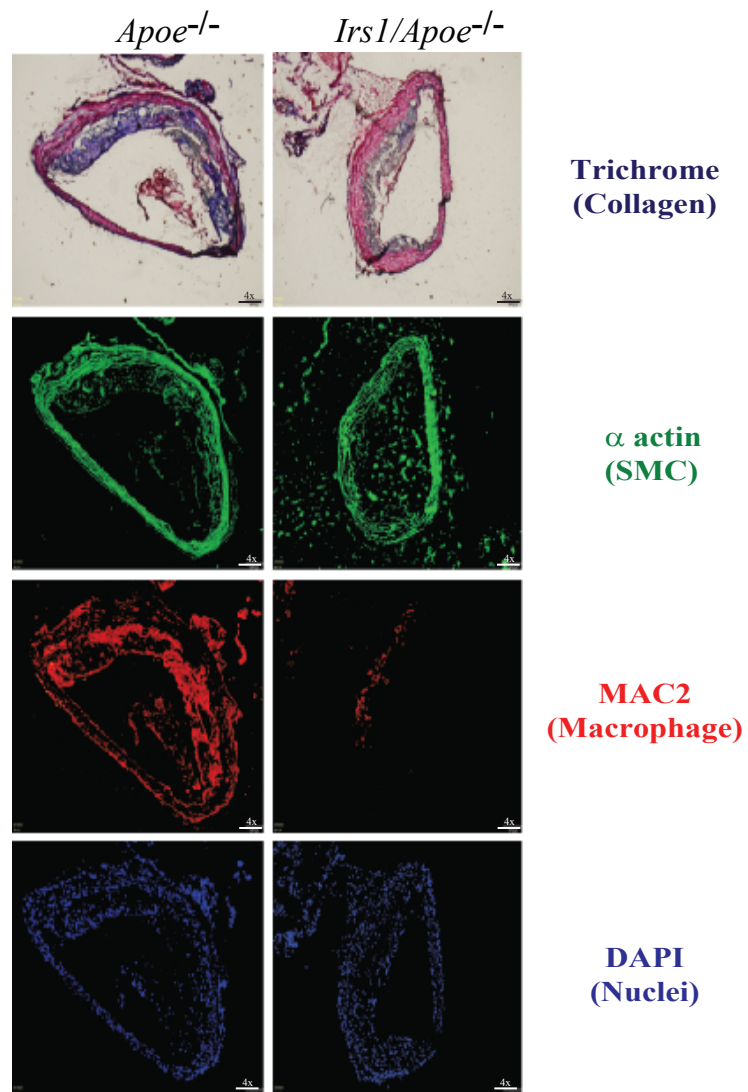

**Supplemental Figure 4. Analysis of atherogenic complexity of *Apoe<sup>-/-</sup>* and *Irs1/Apoe<sup>-/-</sup>* mice with WD feeding.** Representative examples of cross-sections from the aortic sinus stained with trichrome, α actin and MAC2 after feeding on WD for 12 wks. A higher magnification (4X) and scale bar: 100um.

**A**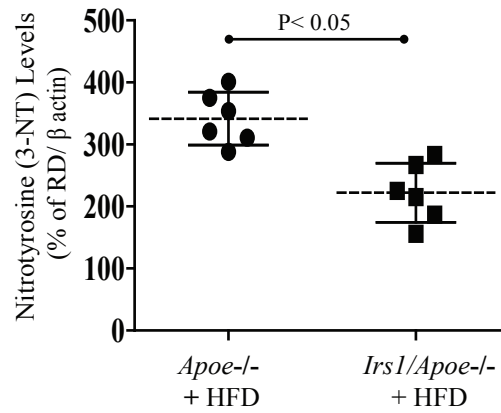**B**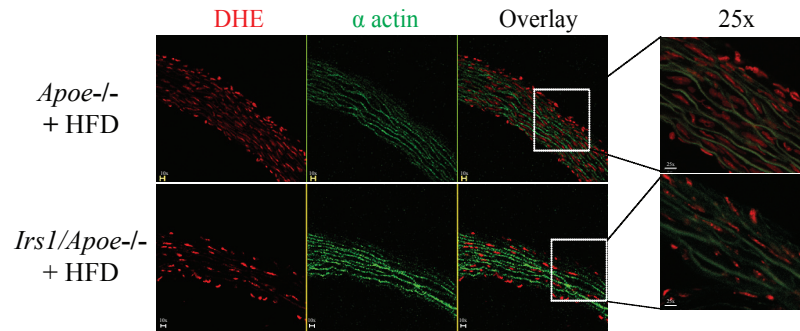**C**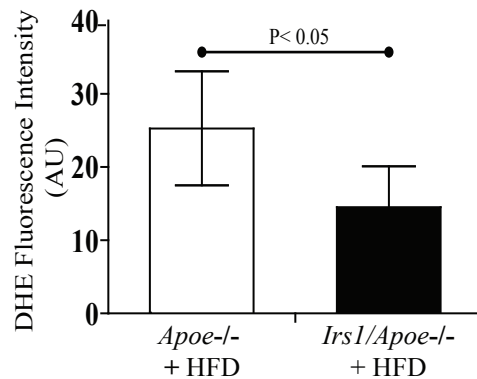

**Supplemental Figure 5. Analysis of the extent of atherosclerosis and its complexity of *Apoe*<sup>-/-</sup> and *Irs1/Apoe*<sup>-/-</sup> mice fed on HFD.** (A) NT production levels in aortas of *Apoe*<sup>-/-</sup> mice and *Irs1/Apoe*<sup>-/-</sup> mice fed on HFD for 12 wks (n = 6 per group). (B) *In situ* DHE staining of aortas from *Apoe*<sup>-/-</sup> mice and *Irs1/Apoe*<sup>-/-</sup> mice under the same condition as (A) higher magnification (10X) and scale bar: 10μm. A higher magnification (25x) of the rectangle shows the VSMC (green) and DHE (red) area in the aorta. Scale bar: 10μm (C) Fluorescent density analysis of DHE. Data are represented as mean ± SEM of at least six mouse replicates. (One-way ANOVA for multiple comparisons involving one factorial variable and two-tailed Student's t-test for pairwise comparisons).

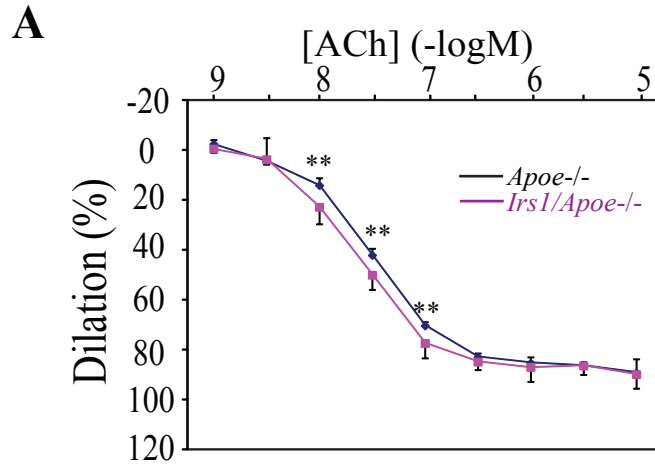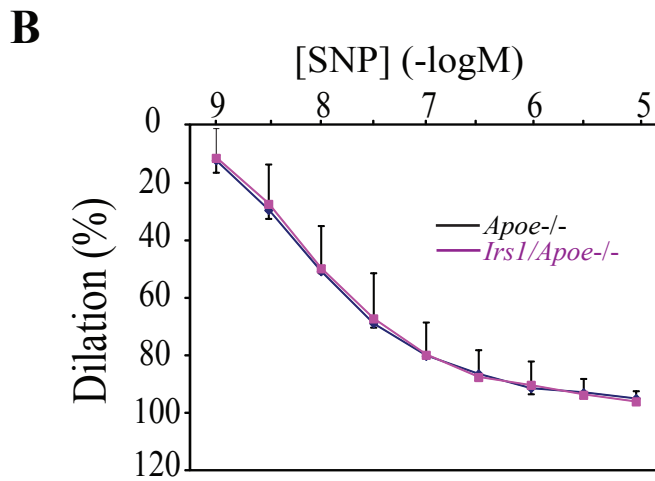

**Supplemental Figure 6. Concentration-relaxation in the femoral arteries isolated from *Apoe*<sup>-/-</sup> and *Irs1/Apoe*<sup>-/-</sup> mice.** Concentration-response curves to (A) acetylcholine and relaxation-response curves to (B) sodium nitroprusside in femoral arteries from *Apoe*<sup>-/-</sup> and *Irs1/Apoe*<sup>-/-</sup> mice. All data are represented as mean ± SEM of at least five mouse replicates. \*; p<0.05 and \*\*; p<0.01 (Mixed effects model for repeated measurement; One-way ANOVA for multiple comparisons involving one factorial variable and two-tailed Student's t-test for pairwise comparisons).

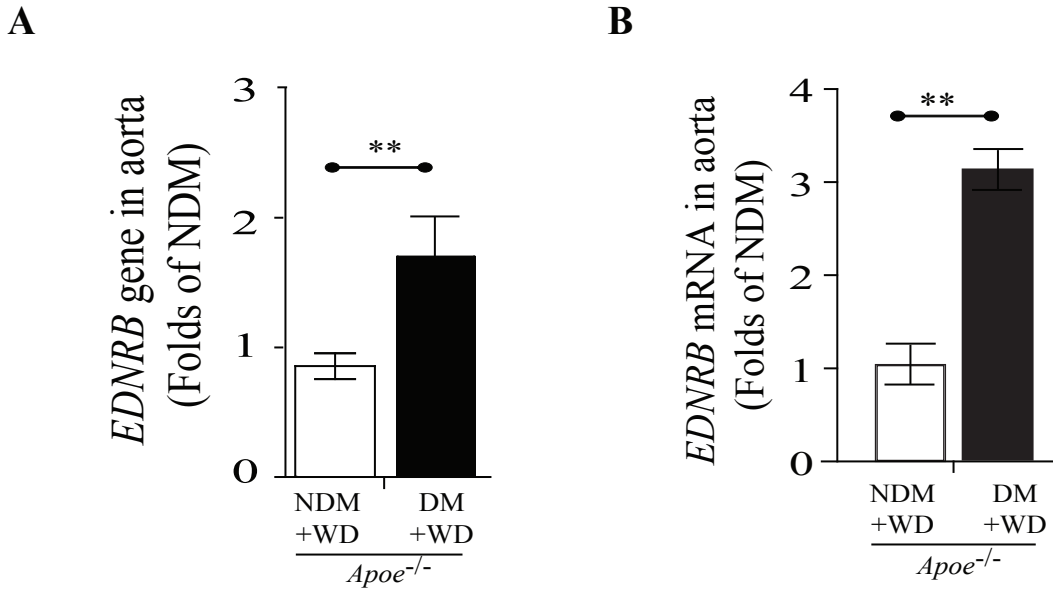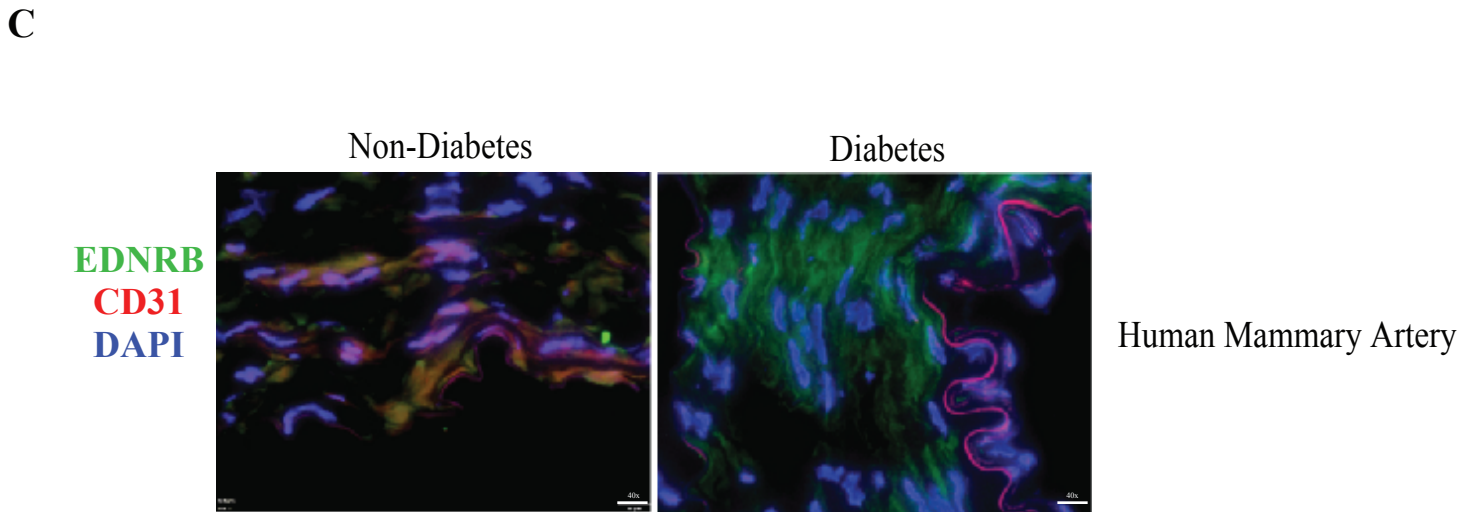

**Supplemental Figure 7. EDNRB is expressed in vascular endothelium from diabetic rodent model and diabetic patients.** *EDNRB* genes (A) and mRNA significantly altered in Aorta of non-diabetic *Apoe*<sup>-/-</sup> mice, compared to diabetic *Apoe*<sup>-/-</sup> mice fed on HFD. (C) Representative staining of EDNRB (Green), nuclei (DAPI), and CD31 (Red) in human mammary artery. A higher magnification (40X) and scale bar: 10um. Data are represented as mean ± SEM of at least three mouse replicates. \*\*: p<0.01 (Two-tailed Student's t-test for pairwise comparisons).

**A**

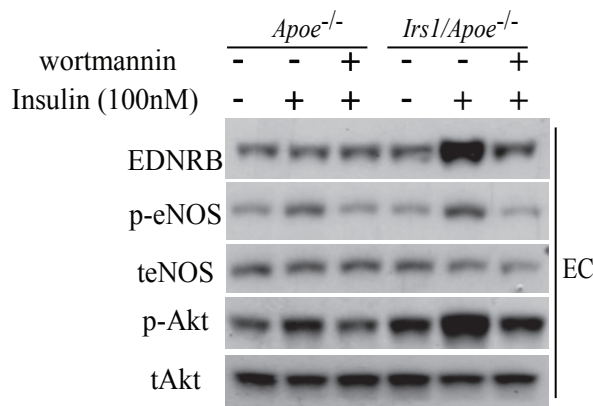

**B**

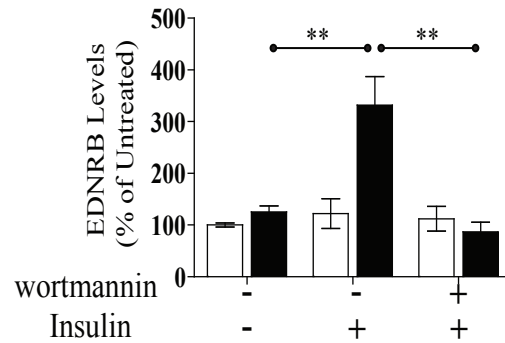

**C**

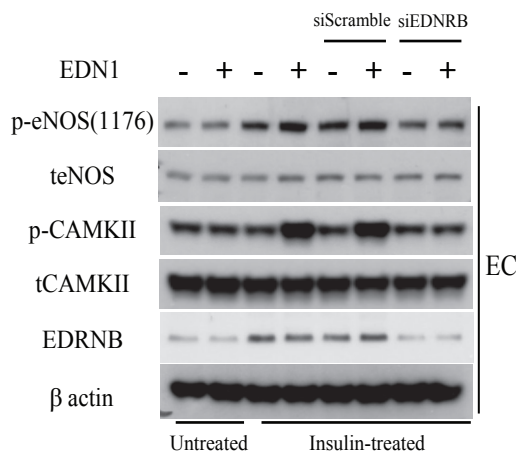

**D**

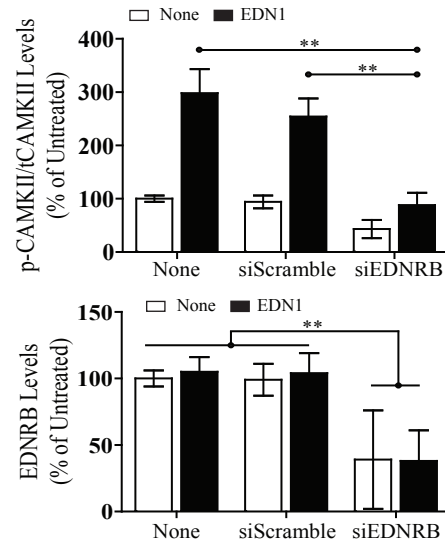

**Supplemental Figure 8. Induction of NO production in EC from *Irs1/Apo<sup>e-/-</sup>* mice through EDN1/EDNRB/ $Ca^{2+}$ /CAMKII pathway.** (A) Immunoblots of p-eNOS, p-Akt and EDNRB protein levels in EC pretreated with wortmannin. (B) Quantification of EDNRB expression level of (A). (C and D) Immunoblots and quantification of p-eNOS, p-CAMKII and EDNRB in EC from *Irs1/Apo<sup>e-/-</sup>* mice transfected with scrambled (siScramble) or EDNRB siRNA (siEDNRB), and stimulated with insulin, and followed by EDN1 incubation. Data are represented as mean  $\pm$  SEM of at least five cellular replicates for EDNRB expression experiments. \*\*:  $p < 0.01$  (two-way/three-way ANOVA for multiple comparisons involving two/three factorial variables and two-tailed Student's t-test for pairwise comparisons).

**A**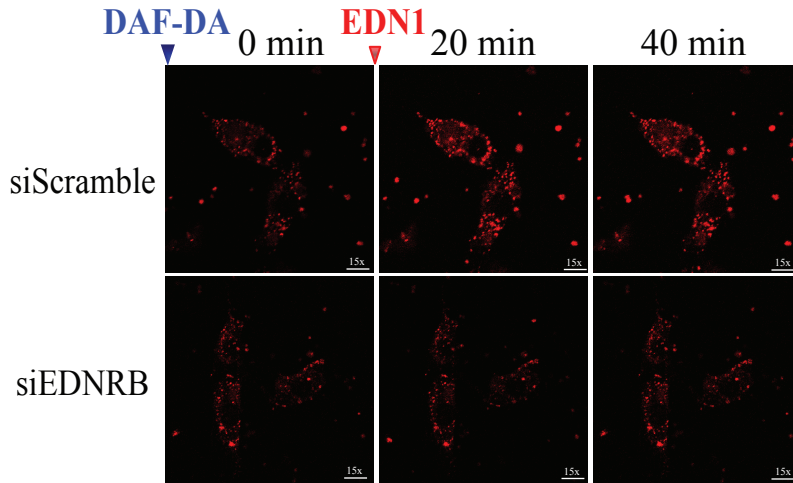**B**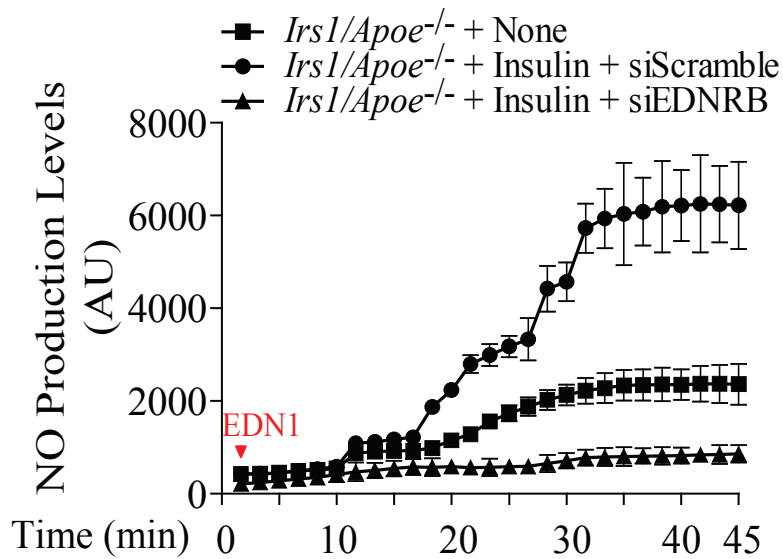

**Supplemental Figure 9. Enhanced NO production through endothelial EDN1/EDNRB activation.** (A) EDN1-induced NO production was reduced in the treated EC with siRNA of EDNRB, compared that of siScramble RNA. A higher magnification (15X) and scale bar: 5μm. NO production was visualized by DAF-2DA fluorescence intensity (FI) (A) and quantified in (B). Data are represented as mean ± SEM of at least five cellular replicates. (Two-tailed Student's t-test for pairwise comparisons).



**A**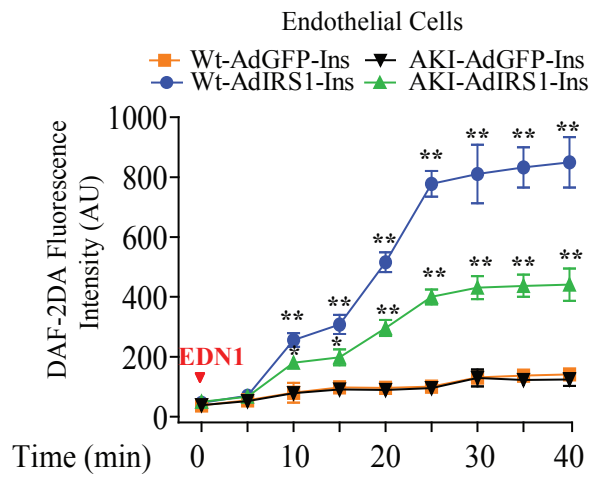**B**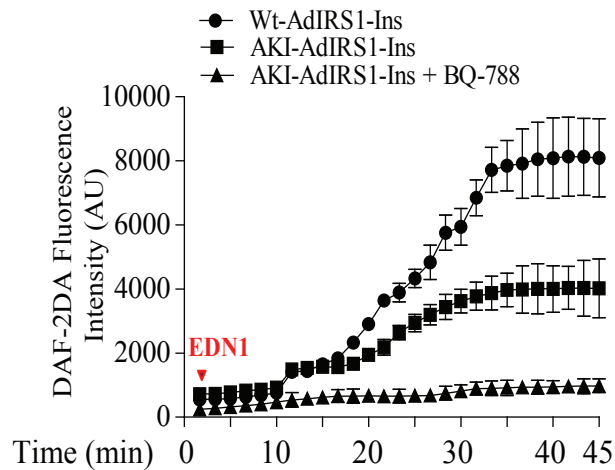

**Supplemental Figure 10. Effect of mutated eNOS Ser to Ala at 1176 (AKI) on NO production via EDNRB pathway.** (A) EC from *Apoe*<sup>-/-</sup> mice were infected with an adenovirus expressing GFP and IRS1 and followed by insulin stimulation. NO production was measured and quantified by DAF-2DA. (B) NO production was quantified in insulin-stimulated aortic EC from *Apoe*<sup>-/-</sup> mice treated with or without BQ-788. AU of DAF-2DA (FI). Data are represented as mean ± SEM of at least five cellular replicates, compared to Wt-AdGFP-Ins or AKI-AdGFP-Ins. \*, p<0.05 and \*\*, p<0.01 (Two-tailed Student's t-test for pairwise comparisons).

**A**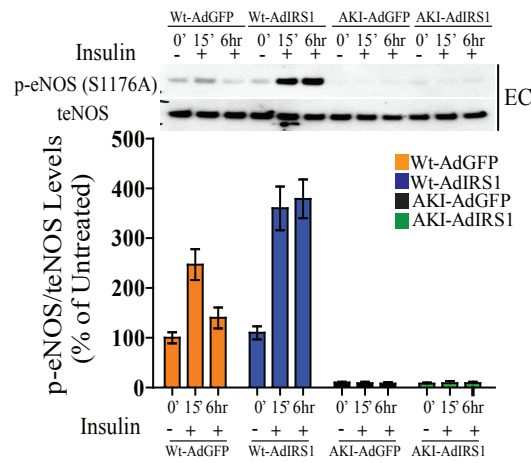**B**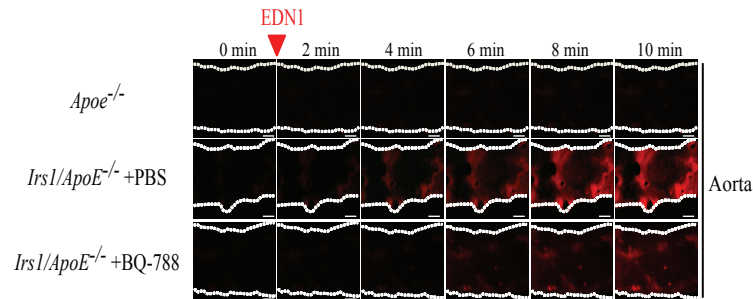**C**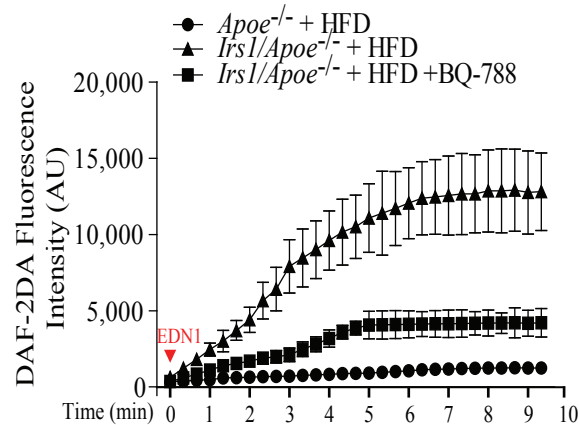

**Supplemental Figure 11. Effect of mutated eNOS Ser to Ala at 1176 (AKI) on NO production in EC or Aorta from *Apoe*<sup>-/-</sup> and *Irs1/ApoE*<sup>-/-</sup> mice.** (A) Immunoblot (Upper) and densitometry (Lower) of p-eNOS in insulin-stimulated aortic EC. (B and C) Representative example (B) of NO production visualized by DAF-2DA and quantified (C) in aorta from *Apoe*<sup>-/-</sup> (n=5) and *Irs1/ApoE*<sup>-/-</sup> (n=5) mice. AU of DAF-2DA (FI). A higher magnification (4X) and scale bar: 100um. Data are represented as mean ± SEM of at least five cellular replicates or mouse replicates, compared to *Apoe*<sup>-/-</sup> + HFD. (Two-tailed Student's t-test for pairwise comparisons).

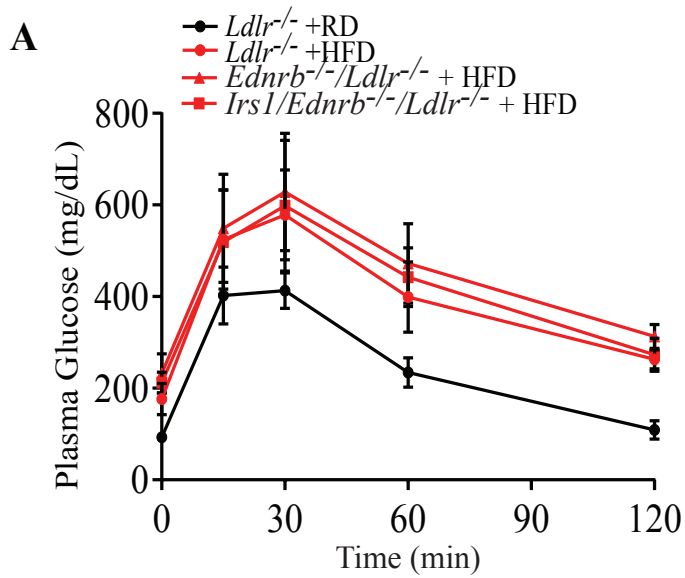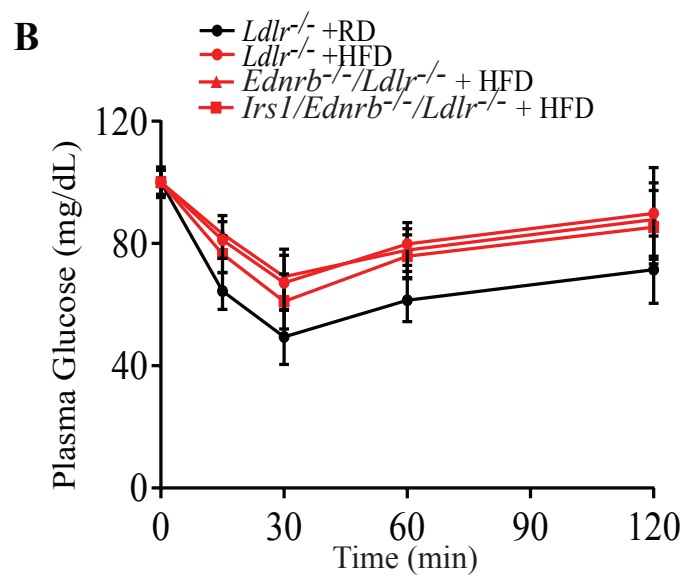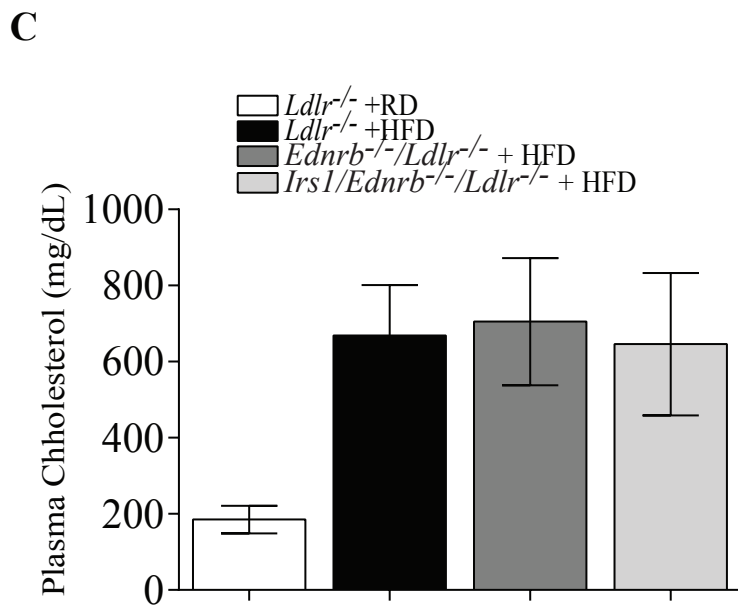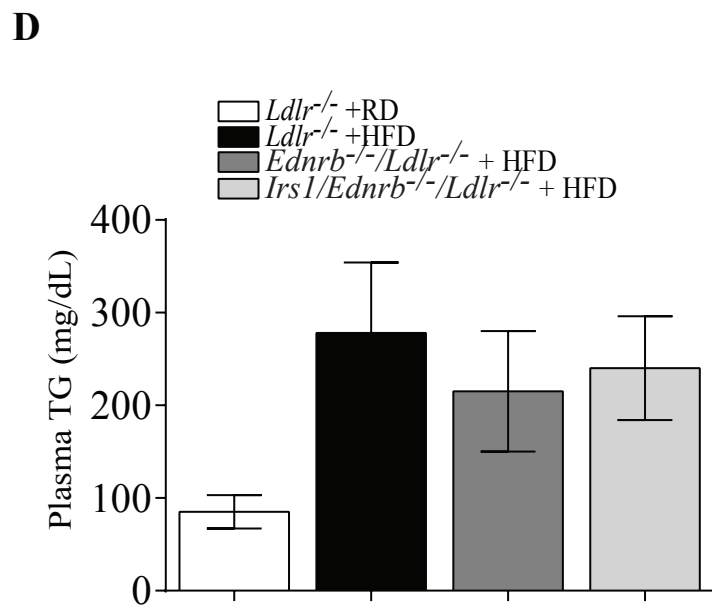

**Supplemental Figure 12. Glucose tolerance, insulin resistance, and dyslipidemia in *Ldlr*<sup>-/-</sup>, *Ednrb*<sup>-/-</sup>/*Ldlr*<sup>-/-</sup>, and *Irs1/Ednrb*<sup>-/-</sup>/*Ldlr*<sup>-/-</sup> mice.** (A) i.p.-GTT, (B) i.p.-ITT, and (C and D) plasma cholesterol and triglyceride in *Ldlr*<sup>-/-</sup>, *Ednrb*<sup>-/-</sup>/*Ldlr*<sup>-/-</sup>, and *Irs1/Ednrb*<sup>-/-</sup>/*Ldlr*<sup>-/-</sup> mice after feeding HFD for 12 wks. All data are represented as mean ± SEM of at least five mouse replicates. (Mixed effects model for repeated measurement; two-way ANOVA for multiple comparisons involving two factorial variables and two-tailed Student's t-test for pairwise comparisons).
